# Supplementary material for: Liquid crystalline cyclic tetramethyltetrasiloxanes containing coumarin moietiesElectronic supplementary information (ESI) available: characterisation data; textures of CS1 and CS8; table of layer spacings. See http://www.rsc.org/suppdata/jm/b3/b302857g/
Source: Royal Society of Chemistry journal article supplement (doi:10.1039/b302857g), 2003-01-01
Supplement: b302857g.pdf [file b302857g.pdf]

## Supplementary materials

### Liquid crystalline cyclic tetramethyltetrasiloxanes containing coumarin moieties

Yanqing Tian,<sup>a,\*</sup> Eiichi Akiyama<sup>b</sup> and Yu Nagase<sup>c</sup>

<sup>a</sup> Sagami Chemical Research Center, 2743-1 Hayakawa, Ayase, Kanagawa 252-1193,  
Japan

<sup>b</sup> Technology Research Center, Ebara Research Co., Ltd., 4-2-1 Honfujisawa, Fujisawa,  
Kanagawa 251-8502, Japan

<sup>c</sup> Department of Applied Chemistry, School of Engineering, Tokai University, 1117  
Kitakaname, Hiratsuka, Kanagawa 259-1292, Japan

### Characterization of dialkyl malonates (**3**)

Dihexyl malonate (**3**, n=6). Yield: 94%. <sup>1</sup>H-NMR (ppm, CDCl<sub>3</sub>): δ = 0.89 (6H, t, CH<sub>3</sub>), 1.21 ~ 1.46 (12H, m, -CH<sub>2</sub>CH<sub>2</sub>CH<sub>2</sub>-), 1.52 ~ 1.78 (4H, m, -CH<sub>2</sub>-), 3.36 (2H, s, OOCCH<sub>2</sub>COO), 4.14 (4H, t, OCH<sub>2</sub>).

Diheptyl malonate (**3**, n=7). Yield: 91%. <sup>1</sup>H-NMR (ppm, DCl<sub>3</sub>): δ = 0.89 (6H, t, CH<sub>3</sub>), 1.18 ~ 1.49 (16H, m, -CH<sub>2</sub>CH<sub>2</sub>CH<sub>2</sub>CH<sub>2</sub>-), 1.52 ~ 1.79 (4H, m, -CH<sub>2</sub>-), 3.36 (2H, s, OOCCH<sub>2</sub>COO), 4.14 (4H, t, -OCH<sub>2</sub>-).

Dioctyl malonate (**3**, n=8). Yield: 95%. <sup>1</sup>H-NMR (ppm, CDCl<sub>3</sub>): δ = 0.89 (6H, t, CH<sub>3</sub>), 1.1 ~ 1.54 (20H, m, -CH<sub>2</sub>CH<sub>2</sub>CH<sub>2</sub>CH<sub>2</sub>CH<sub>2</sub>-), 1.54 ~ 1.78 (4H, m, -CH<sub>2</sub>-), 3.36 (2H, s, OOCCH<sub>2</sub>COO), 4.14 (4H, t, OCH<sub>2</sub>).

### Characterization of alkyl 7-hydroxy-coumarin-3-carboxylate (**4**)

*Ethyl 7-hydroxy-coumarin-3-carboxylate* (**4**, n=2). Yield: 58%. <sup>1</sup>H-NMR (ppm, DMSO): δ = 1.35 (3H, t, CH<sub>3</sub>), 4.33 (2H, t, OCH<sub>2</sub>), 6.79 (1H, d, phenyl), 6.95 (1H, m, phenyl), 7.75 (1H, d, phenyl), 8.59 (1H, s, -CH=).

*Propyl 7-hydroxy-coumarin-3-carboxylate* (**4**, n=3). Yield: 35%. <sup>1</sup>H-NMR (ppm, DMSO): δ = 0.98 (3H, t, CH<sub>3</sub>), 1.67 ~ 1.81 (2H, m, -CH<sub>2</sub>-), 4.19 (2H, t, OCH<sub>2</sub>), 6.79 (1H, d, phenyl), 6.95 (1H, m, phenyl), 7.75 (1H, d, phenyl), 8.61 (1H, s, -CH=).

*Butyl 7-hydroxy-coumarin-3-carboxylate* (**4**, n=4). Yield: 39%. <sup>1</sup>H-NMR (ppm, CD<sub>3</sub>COCD<sub>3</sub>): δ = 0.98 (3H, t, CH<sub>3</sub>), 1.37 ~ 1.52 (2H, m, -CH<sub>2</sub>-), 1.67 ~ 1.81 (2H, m, -CH<sub>2</sub>-), 4.29 (2H, t, OCH<sub>2</sub>), 6.79 (1H, d, phenyl), 6.95 (1H, m, phenyl), 7.75 (1H, d, phenyl), 8.61 (1H, s, -CH=).

*Pentyl 7-hydroxy-coumarin-3-carboxylate* (**4**, n=5). Yield: 32%. <sup>1</sup>H-NMR (ppm, CDCl<sub>3</sub>): δ = 0.90 (3H, t, CH<sub>3</sub>), 1.35 ~ 1.77 (6H, m, -CH<sub>2</sub>-), 4.33 (2H, t, OCH<sub>2</sub>), 6.93 (1H, m, phenyl), 6.95 (1H, d, phenyl), 7.50 (1H, d, phenyl), 7.71 (1H, br, OH), 8.53 (1H, s, -CH=).

*Hexyl 7-hydroxy-coumarin-3-carboxylate* (**4**, n=6). Yield: 33%. <sup>1</sup>H-NMR (ppm, CDCl<sub>3</sub>): δ = 0.90 (3H, t, CH<sub>3</sub>), 1.3 ~ 1.77 (8H, m, -CH<sub>2</sub>-), 4.33 (2H, t, OCH<sub>2</sub>), 6.93 (1H, m, phenyl), 6.95 (1H, d, phenyl), 7.50 (1H, d, phenyl), 7.71 (1H, br s, OH), 8.54 (1H, s, -CH=).

*Heptyl 7-hydroxy-coumarin-3-carboxylate (4, n=7)*. Yield: 36%. <sup>1</sup>H-NMR (ppm, CDCl<sub>3</sub>): δ = 0.88 (3H, t, CH<sub>3</sub>), 1.28 ~ 1.77 (10H, m, -CH<sub>2</sub>-), 4.33 (2H, t, OCH<sub>2</sub>), 6.93 (1H, m, phenyl), 6.95 (1H, d, phenyl), 7.50 (1H, d, phenyl), 7.70 (1H, br, OH), 8.53 (1H, s, -CH=).

*Octyl 7-hydroxy-coumarin-3-carboxylate (4, n=8)*. Yield: 40%. <sup>1</sup>H-NMR (ppm, CDCl<sub>3</sub>): δ = 0.88 (3H, t, CH<sub>3</sub>), 1.28 ~ 1.77 (12H, m, -CH<sub>2</sub>-), 4.33 (2H, t, OCH<sub>2</sub>), 6.93 (1H, m, phenyl), 6.95 (1H, d, phenyl), 7.50 (1H, d, phenyl), 7.70 (1H, br, OH), 8.54 (1H, s, -CH=).

#### Characterization of vinyl terminated molecules with coumarin units (V)

*Methyl 7-[4-(pent-4-eneoxy)benzoyloxy]-coumarin-3-carboxylate (V1)*. Yield: 78%. <sup>1</sup>H-NMR (ppm, CDCl<sub>3</sub>): δ = 1.82 ~ 2.40 (4H, m, CH<sub>2</sub>), 3.97 (3H, s, CH<sub>3</sub>), 4.08 (2H, t, OCH<sub>2</sub>), 5.05 (2H, m, CH<sub>2</sub>=), 5.86 (1H, m, =CH-), 6.98 (2H, d, phenyl), 7.23 (2H, m, phenyl), 7.66 (1H, d, phenyl), 8.14 (2H, m, phenyl), 8.59 (1H, s, -CH=). Elemental analysis: Calc. for C<sub>23</sub>H<sub>20</sub>O<sub>7</sub> : C, 67.64; H, 4.94 percent. Found: C, 67.65; H, 4.73 percent.

*Ethyl 7-[4-(pent-4-eneoxy)benzoyloxy]-coumarin-3-carboxylate (V2)*. Yield: 60%. <sup>1</sup>H-NMR (ppm, CDCl<sub>3</sub>): δ = 1.39 (3H, t, CH<sub>3</sub>), 1.82 ~ 2.40 (4H, m, CH<sub>2</sub>), 4.08 (2H, t, CH<sub>2</sub>), 4.42 (2H, t, COOCH<sub>2</sub>), 5.05 (2H, m, CH<sub>2</sub>=), 5.86 (1H, m, =CH-), 6.98 (2H, d, phenyl), 7.23 (2H, m, phenyl), 7.66 (1H, d, phenyl), 8.14 (2H, m, phenyl), 8.55 (1H, s, -CH=). Elemental analysis: Calc. for C<sub>24</sub>H<sub>22</sub>O<sub>7</sub> : C, 68.23; H, 5.25 percent. Found: C, 68.28; H, 5.25 percent.

*Propyl 7-[4-(pent-4-eneoxy)benzoyloxy]-coumarin-3-carboxylate (V3)*. Yield: 89%. <sup>1</sup>H-NMR (ppm, CDCl<sub>3</sub>): δ = 1.04 (3H, t, CH<sub>3</sub>), 1.92 ~ 2.42 (4H, m, CH<sub>2</sub>), 4.08 (2H, t, CH<sub>2</sub>), 4.42 (2H, t, COOCH<sub>2</sub>), 5.05 (2H, m, CH<sub>2</sub>=), 5.86 (1H, m, =CH-), 6.98 (2H, d, phenyl), 7.23 (2H, m, phenyl), 7.66 (1H, d, phenyl), 8.14 (2H, m, phenyl), 8.53 (1H, s, -CH=). Elemental analysis: Calc. for C<sub>25</sub>H<sub>24</sub>O<sub>7</sub> : C, 68.79; H, 5.54 percent. Found: C, 68.99; H, 5.42 percent.

*Butyl 7-[4-(pent-4-eneoxy)benzoyloxy]-coumarin-3-carboxylate (V4)*. Yield: 63%. <sup>1</sup>H-NMR (ppm, CDCl<sub>3</sub>): δ = 0.99 (3H, t, CH<sub>3</sub>), 1.32 ~ 2.40 (6H, m, CH<sub>2</sub>), 4.08 (2H, t, CH<sub>2</sub>), 4.36 (2H, t, COOCH<sub>2</sub>), 5.05 (2H, m, CH<sub>2</sub>=), 5.86 (1H, m, =CH-), 6.98 (2H, d, phenyl), 7.23 (2H, m, phenyl), 7.66 (1H, d, phenyl), 8.14 (2H, m, phenyl), 8.53 (1H, s, -CH=).

Elemental analysis: Calc. for  $C_{26}H_{26}O_7$  : C, 69.32; H, 5.81 percent. Found: C, 69.51; H, 5.66 percent.

*Pentyl 7-[4-(pent-4-eneoxy)benzoyloxy]-coumarin-3-carboxylate (V5)*. Yield: 69%.  $^1H$ -NMR (ppm,  $CDCl_3$ ):  $\delta$  = 0.89 (3H, t,  $CH_3$ ), 1.4 (4H, m,  $(CH_2)_2$ ), 1.85 (2H, m,  $CH_2$ ), 1.93 (2H, m,  $CH_2$ ), 2.26 (2H, m,  $CH_2$ ), 4.08 (2H, t,  $OCH_2$ ), 4.35 (2H, t,  $COOCH_2$ ), 5.05 (2H, m,  $CH_2=$ ), 5.85 (1H, m,  $=CH-$ ), 6.98 (2H, d, phenyl), 7.22 (2H, m, phenyl), 7.65 (1H, d, phenyl), 8.16 (2H, m, phenyl), 8.53 (1H, s,  $-CH=$ ). Elemental analysis: Calc. for  $C_{27}H_{28}O_7$  : C, 69.81; H, 6.08 percent. Found: C, 70.02; H, 6.00 percent.

*Hexyl 7-[4-(pent-4-eneoxy)benzoyloxy]-coumarin-3-carboxylate (V6)*. Yield: 63%.  $^1H$ -NMR (ppm,  $CDCl_3$ ):  $\delta$  = 0.91 (3H, t,  $CH_3$ ), 1.3 ~ 1.5 (6H, m,  $(CH_2)_3$ ), 1.85 (2H, m,  $CH_2$ ), 1.93 (2H, m,  $CH_2$ ), 2.26 (2H, m,  $CH_2$ ), 4.08 (2H, t,  $OCH_2$ ), 4.35 (2H, t,  $COOCH_2$ ), 5.05 (2H, m,  $CH_2=$ ), 5.85 (1H, m,  $=CH-$ ), 6.98 (2H, d, phenyl), 7.22 (2H, m, phenyl), 7.65 (1H, d, phenyl), 8.16 (2H, m, phenyl), 8.53 (1H, s,  $-CH=$ ). Elemental analysis: Calc. for  $C_{28}H_{30}O_7$  : C, 70.27; H, 6.32 percent. Found: C, 70.50; H, 6.34 percent.

*Heptyl 7-[4-(pent-4-eneoxy)benzoyloxy]-coumarin-3-carboxylate (V7)*. Yield: 70%.  $^1H$ -NMR (ppm,  $CDCl_3$ ):  $\delta$  = 0.89 (3H, t,  $CH_3$ ), 1.2 ~ 1.5 (8H, m,  $(CH_2)_4$ ), 1.80 (2H, m,  $CH_2$ ), 1.95 (2H, m,  $CH_2$ ), 2.29 (2H, m,  $CH_2$ ), 4.08 (2H, t,  $OCH_2$ ), 4.35 (2H, t,  $COOCH_2$ ), 5.05 (2H, m,  $CH_2=$ ), 5.85 (1H, m,  $=CH-$ ), 6.98 (2H, d, phenyl), 7.22 (2H, m, phenyl), 7.65 (1H, d, phenyl), 8.16 (2H, m, phenyl), 8.53 (1H, s,  $-CH=$ ). Elemental analysis: Calc. for  $C_{29}H_{32}O_7$  : C, 70.71; H, 6.55 percent. Found: C, 70.88; H, 6.52 percent.

*Octyl 7-[4-(pent-4-eneoxy)benzoyloxy]-coumarin-3-carboxylate (V8)*. Yield: 75%.  $^1H$ -NMR (ppm,  $CDCl_3$ ):  $\delta$  = 0.89 (3H, t,  $CH_3$ ), 1.2 ~ 1.5 (10H, m,  $(CH_2)_5$ ), 1.85 (2H, m,  $CH_2$ ), 1.93 (2H, m,  $CH_2$ ), 2.26 (2H, m,  $CH_2$ ), 4.08 (2H, t,  $OCH_2$ ), 4.35 (2H, t,  $COOCH_2$ ), 5.05 (2H, m,  $CH_2=$ ), 5.85 (1H, m,  $=CH-$ ), 6.98 (2H, d, phenyl), 7.22 (2H, m, phenyl), 7.65 (1H, d, phenyl), 8.16 (2H, m, phenyl), 8.53 (1H, s,  $-CH=$ ). Elemental analysis: Calc. for  $C_{30}H_{34}O_7$  : C, 71.12; H, 6.76 percent. Found: C, 71.11; H, 6.86 percent.

Characterization of cyclic tetramethyltetrasiloxanes with coumarin moieties (CS)

**CSI**. Yield: 20.3%.  $^1H$ -NMR (ppm,  $CDCl_3$ ):  $\delta$  = 0.11 (12H, br s,  $SiCH_3$ ), 0.59 (8H, br m,  $SiCH_2-$ ), 1.41~1.52 (16H, m,  $-CH_2CH_2-$ ), 1.67~ 1.95 (8H, m,  $-CH_2-$ ), 4.02 (12H, s,  $COOCH_3$ ), 4.11 (8H, m,  $OCH_2$ ), 6.94 (8H, br m, phenyl), 7.22 (8H, br m, phenyl), 7.66

(4H, d, phenyl), 8.10 (8H, m, phenyl), 8.56 (4H, s, -CH=). IR (KBr disk,  $\text{cm}^{-1}$ ): 1763, 1732, 1703 (carbonyl, esters). Elemental analysis: Calc. for  $\text{C}_{96}\text{H}_{96}\text{O}_{32}\text{Si}_4$ : C, 61.52; H, 5.16 percent. Found: C, 61.29; H, 5.15 percent.

**CS2.** Yield: 36.5%.  $^1\text{H-NMR}$  (ppm,  $\text{CDCl}_3$ ):  $\delta$  = 0.11 (12H, br s,  $\text{SiCH}_3$ ), 0.59 (8H, br m,  $\text{SiCH}_2$ -), 1.41~1.88 (36H, m,  $-\text{CH}_2\text{CH}_2\text{CH}_2-$  and  $\text{CH}_3$ ), 4.03 (8H, br m,  $\text{OCH}_2$ ), 4.38 (8H, q,  $\text{COOCH}_2$ ), 6.92 (8H, br m, phenyl), 7.22 (8H, br m, phenyl), 7.65 (4H, d, phenyl), 8.06 (8H, m, phenyl), 8.52 (4H, s, -CH=). IR (KBr disk,  $\text{cm}^{-1}$ ): 1763, 1732, 1705 (carbonyl, esters). Elemental analysis: Calc. for  $\text{C}_{100}\text{H}_{104}\text{O}_{32}\text{Si}_4$ : C, 62.22; H, 5.43 percent. Found: C, 62.17; H, 5.47 percent.

**CS3.** Yield: 34.5%.  $^1\text{H-NMR}$  (ppm,  $\text{CDCl}_3$ ):  $\delta$  = 0.11 (12H, br s,  $\text{SiCH}_3$ ), 0.59 (8H, br m,  $\text{SiCH}_2$ -), 1.15 (12H, t,  $\text{CH}_3$ ), 1.62~1.96 (32H, m,  $-\text{CH}_2\text{CH}_2\text{CH}_2-$  and  $-\text{CH}_2-$ ), 4.03 (8H, br m,  $\text{OCH}_2$ ), 4.38 (8H, t,  $\text{COOCH}_2$ ), 6.92 (8H, br m, phenyl), 7.22 (8H, br m, phenyl), 7.65 (4H, d, phenyl), 8.06 (8H, br m, phenyl), 8.63 (4H, s, -CH=). IR (KBr disk,  $\text{cm}^{-1}$ ): 1763, 1732, 1705 (carbonyl, esters). Elemental analysis: Calc. for  $\text{C}_{104}\text{H}_{112}\text{O}_{32}\text{Si}_4$ : C, 62.88; H, 5.68 percent. Found: C, 62.81; H, 5.81 percent.

**CS4.** Yield: 27.5%.  $^1\text{H-NMR}$  (ppm,  $\text{CDCl}_3$ ):  $\delta$  = 0.11 (12H, br s,  $\text{SiCH}_3$ ), 0.59 (8H, br m,  $\text{SiCH}_2$ -), 0.98 (12H, t,  $\text{CH}_3$ ), 1.43~1.85 (40H, m,  $-\text{CH}_2\text{CH}_2\text{CH}_2-$  and  $-\text{CH}_2\text{CH}_2-$ ), 4.03 (8H, br m,  $\text{OCH}_2$ ), 4.38 (8H, t,  $\text{COOCH}_2$ ), 6.92 (8H, br m, phenyl), 7.22 (8H, br m, phenyl), 7.65 (4H, d, phenyl), 8.06 (8H, br m, phenyl), 8.50 (4H, s, -CH=). IR (KBr disk,  $\text{cm}^{-1}$ ): 1763, 1732, 1705 (carbonyl, esters). Elemental analysis: Calc. for  $\text{C}_{108}\text{H}_{120}\text{O}_{32}\text{Si}_4$ : C, 63.51; H, 5.92 percent. Found: C, 63.69; H, 6.02 percent.

**CS5.** Yield: 24.8%.  $^1\text{H-NMR}$  (ppm,  $\text{CDCl}_3$ ):  $\delta$  = 0.11 (12H, br s,  $\text{SiCH}_3$ ), 0.59 (8H, br m,  $\text{SiCH}_2$ -), 0.92 (12H, t,  $\text{CH}_3$ ), 1.3 ~1.84 (48H, m,  $-\text{CH}_2\text{CH}_2\text{CH}_2-$  and  $-\text{CH}_2\text{CH}_2\text{CH}_2-$ ), 4.04 (8H, br m,  $\text{OCH}_2$ ), 4.34 (8H, t,  $\text{COOCH}_2$ ), 6.95 (8H, br m, phenyl), 7.24 (8H, br m, phenyl), 7.65 (4H, d, phenyl), 8.11 (8H, m, phenyl), 8.53 (4H, s, -CH=). IR (KBr disk,  $\text{cm}^{-1}$ ): 1763, 1736, 1704 (carbonyl, esters). Elemental analysis: Calc. for  $\text{C}_{112}\text{H}_{128}\text{O}_{32}\text{Si}_4$ : C, 64.09; H, 6.14 percent. Found: C, 64.37; H, 6.25 percent.

**CS6.** Yield: 25.3%.  $^1\text{H-NMR}$  (ppm,  $\text{CDCl}_3$ ):  $\delta$  = 0.11 (12H, br s,  $\text{SiCH}_3$ ), 0.59 (8H, br m,  $\text{SiCH}_2$ -), 0.92 (12H, t,  $\text{CH}_3$ ), 1.3 ~1.84 (56H, m,  $-\text{CH}_2\text{CH}_2\text{CH}_2-$  and  $-\text{CH}_2\text{CH}_2\text{CH}_2\text{CH}_2-$ ), 4.04 (8H, br m,  $\text{OCH}_2$ ), 4.34 (8H, t,  $\text{COOCH}_2$ ), 6.95 (8H, br m,

phenyl), 7.24 (8H, br m, phenyl), 7.65 (4H, d, phenyl), 8.11 (8H, m, phenyl), 8.50 (4H, s, -CH=). IR (KBr disk,  $\text{cm}^{-1}$ ): 1763, 1736, 1704 (carbonyl, esters). Elemental analysis: Calc. for  $\text{C}_{116}\text{H}_{136}\text{O}_{32}\text{Si}_4$ : C, 64.66; H, 6.36 percent. Found: C, 64.51; H, 6.42 percent.

**CS7.** Yield: 24.9%.  $^1\text{H-NMR}$  (ppm,  $\text{CDCl}_3$ ):  $\delta$  = 0.11 (12H, br s,  $\text{SiCH}_3$ ), 0.59 (8H, br m,  $\text{SiCH}_2$ -), 0.92 (12H, t,  $\text{CH}_3$ ), 1.31 ~1.84 (64H, m,  $-\text{CH}_2\text{CH}_2\text{CH}_2-$  and  $-\text{CH}_2\text{CH}_2\text{CH}_2\text{CH}_2\text{CH}_2-$ ), 4.04 (8H, br m,  $\text{OCH}_2$ ), 4.34 (8H, t,  $\text{COOCH}_2$ ), 6.95 (8H, br m, phenyl), 7.24 (8H, br m, phenyl), 7.65 (4H, d, phenyl), 8.11 (8H, m, phenyl), 8.50 (4H, s, -CH=). IR (KBr disk,  $\text{cm}^{-1}$ ): 1763, 1736, 1704 (carbonyl, esters). Elemental analysis: Calc. for  $\text{C}_{120}\text{H}_{144}\text{O}_{32}\text{Si}_4$ : C, 65.19; H, 6.56 percent. Found: C, 65.16; H, 6.62 percent.

**CS8.** Yield: 25.9%.  $^1\text{H-NMR}$  (ppm,  $\text{CDCl}_3$ ):  $\delta$  = 0.11 (12H, br s,  $\text{SiCH}_3$ ), 0.59 (8H, br m,  $\text{SiCH}_2$ -), 0.86 (12H, t,  $\text{CH}_3$ ), 1.30~1.82 (72H, m,  $-\text{CH}_2\text{CH}_2\text{CH}_2-$  and  $-\text{CH}_2\text{CH}_2\text{CH}_2\text{CH}_2\text{CH}_2\text{CH}_2-$ ), 4.04 (8H, br m,  $\text{OCH}_2$ ), 4.34 (8H, t,  $\text{COOCH}_2$ ), 6.95 (8H, br m, phenyl), 7.24 (8H, br m, phenyl), 7.65 (4H, d, phenyl), 8.11 (8H, m, phenyl), 8.50 (4H, s, -CH=). IR (KBr disk,  $\text{cm}^{-1}$ ): 1763, 1736, 1704 (carbonyl, esters). Elemental analysis: Calc. for  $\text{C}_{124}\text{H}_{152}\text{O}_{32}\text{Si}_4$ : C, 65.70; H, 6.76 percent. Found: C, 65.74; H, 6.90 percent.

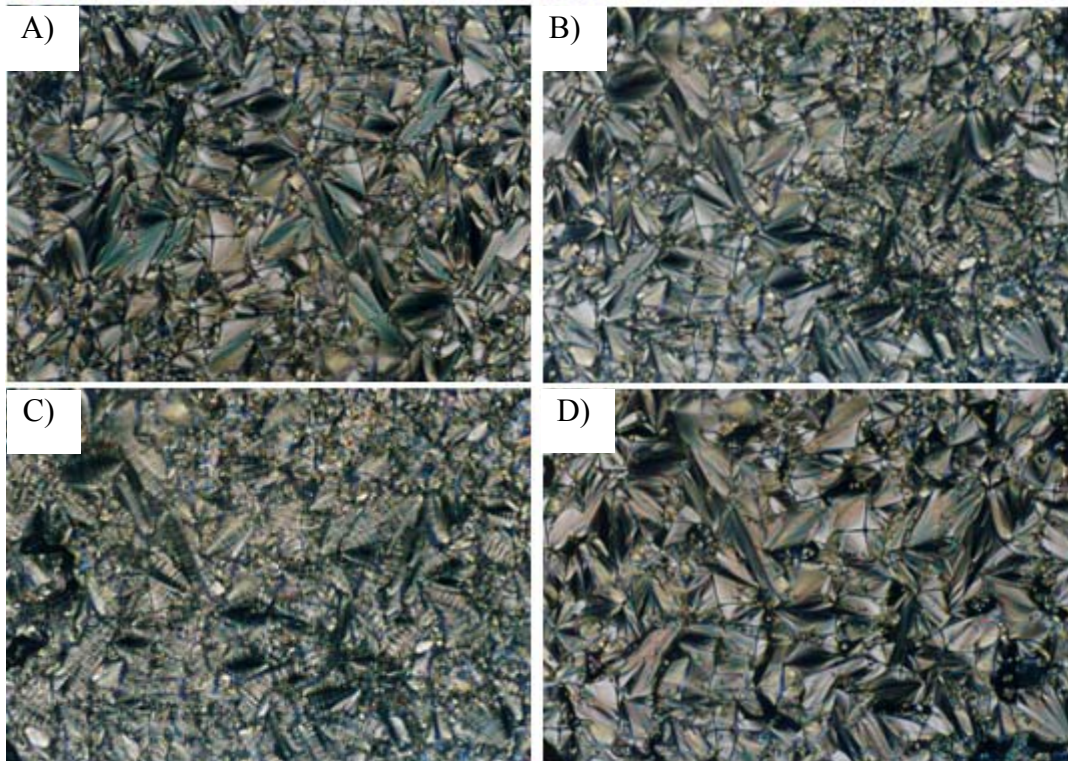

Supplementary Fig. 1. Typical textures of **CS1** at different phases. a) focal-conic texture of smectic A phase at 190°C; b) the texture at the transition from SmA phase to crystal phase at 131°C on cooling; c) the texture of crystal phase at 120°C; d) the texture of smectic A phase at 176°C on the subsequent heating. (magnification: 400x)

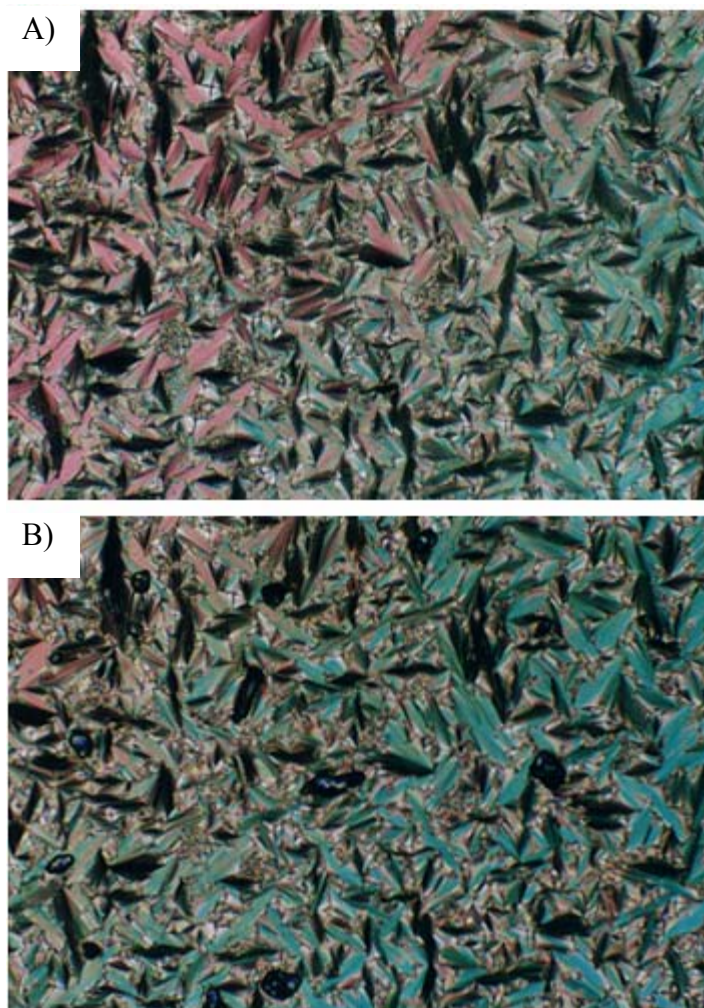

Supplementary Fig. 2. Typical textures of **CS8**. a) focal-conic texture of smectic A at 124°C; b) focal-conic texture of the glassy state at room temperature. (magnification: 400x)



Supplementary Table 1 Layer spacing,  $d$ , as determined by X-ray diffraction and calculated extended molecular length,  $L$ , by MM2 force field method

| Code       | Tail length (n) | Measured Layer Spacing ( $d$ , Å) | Calculated Extended Molecular Length ( $L$ , Å) | $d/L$ |
|------------|-----------------|-----------------------------------|-------------------------------------------------|-------|
| <b>V1</b>  | 1               | *                                 | 22.1                                            | *     |
| <b>V2</b>  | 2               | *                                 | 22.9                                            | *     |
| <b>V3</b>  | 3               | 23.4                              | 24.3                                            | 0.96  |
| <b>V4</b>  | 4               | 24.5                              | 25.3                                            | 0.97  |
| <b>V5</b>  | 5               | 24.3                              | 26.6                                            | 0.92  |
| <b>V6</b>  | 6               | 26.8                              | 27.6                                            | 0.97  |
| <b>V7</b>  | 7               | ----                              | 29.0                                            | ----  |
| <b>V8</b>  | 8               | 26.9                              | 30.0                                            | 0.90  |
| <b>CS1</b> | 1               | 27.1                              |                                                 | 1.23  |
| <b>CS2</b> | 2               | 25.8                              |                                                 | 1.13  |
| <b>CS3</b> | 3               | 25.8                              |                                                 | 1.06  |
| <b>CS4</b> | 4               | 26.3                              |                                                 | 1.06  |
| <b>CS5</b> | 5               | 26.1                              |                                                 | 0.98  |
| <b>CS6</b> | 6               | 25.1                              |                                                 | 0.91  |
| <b>CS7</b> | 7               | 24.5                              |                                                 | 0.85  |
| <b>CS8</b> | 8               | 25.1                              |                                                 | 0.84  |

\*: Not measured because they don't show liquid crystalline properties. ---: Not measured due to its narrow liquid crystalline temperature range.
